# Supplementary material for: Quantitative analysis of CO2 emissions reduction potential of alternative light olefins production processes
Source: Royal Society of Chemistry journal article supplement (doi:10.1039/d3gc01237a), 2023-01-01
Supplement: d3gc01237a1.pdf [file d3gc01237a1.pdf]

Electronic Supplementary Information:

## Quantitative Analysis of CO<sub>2</sub> Emissions Reduction Potential of Alternative Light Olefins Production Processes

Marian Flores-Granobles and Mark Saeys

### S1 Process model assumptions

The following general assumptions were considered for the process models developed in Aspen Plus® (Figures S1-S6):

1. Naphtha is supplied at 25 °C and atmospheric pressure. The composition of naphtha is shown in Table S1.
2. Pure CO<sub>2</sub> is supplied at 40 °C and 130 kPa. The electricity requirements and CO<sub>2</sub> emissions due to CO<sub>2</sub> capture from the CO<sub>2</sub> source and CO<sub>2</sub> purification were not considered in the models.
3. Pure H<sub>2</sub> is produced by water electrolysis using Proton-Exchange-Membrane Electrolyzers (PEME) or Solid Oxide Electrolyzers (SOE). When PEME are used, water is pumped to the required pressure before the electrolysis. When SOE are used, steam is electrolyzed and the produced H<sub>2</sub> is compressed to the required pressure. More details are available in the section "H<sub>2</sub> and syngas production by electrolysis".
4. Pumps, compressors, and turbines operate with 70% of isentropic efficiency.
5. Cooling water was used to cool streams to 35 °C. The energy required for this cooling cycle was not considered in the energy balance.
6. Chilled water was used to cool streams to between 15 °C and 35 °C. This refrigeration cycle uses 0.06 kWh per MJ heat removed.<sup>1</sup>
7. Cooling to between -30 °C and 15 °C, to between -90 °C and -30 °C and to between -147 °C and -90 °C required cryogenic refrigeration cycles using C<sub>3</sub>H<sub>8</sub>, C<sub>2</sub>H<sub>4</sub> and CH<sub>4</sub> as cooling media, respectively. The corresponding electricity requirements are calculated using separate Aspen Plus® models.
8. Electric boilers convert electrical energy to heat with 100% efficiency.
9. Membrane separation was used in the CO<sub>2</sub> to olefins (C<sup>2</sup>O) scenario to recover CO<sub>2</sub> and H<sub>2</sub> from the product stream for recycle to the C<sup>2</sup>O reactor. A cellulose acetate membrane is modeled in Matlab® using the permeability of the gas components in Table S2. The Matlab® model provides the pressure drop and split ratio per component to the permeate and retentate streams based on the system equations below<sup>2</sup>:

Variables:

$P_1$ : Feed gas pressure [bar]

$P_2$ : Permeate pressure [bar]

$\delta$ : membrane thickness [cm]

$\#_{comp}$ : number of components [-]

$q_i$ : Permeability of component "i" [Barrer] based on Table S2

$x_i$ : Molar fraction of component "i" in retentate stream [-]

$y_i$ : Molar fraction of component "i" in permeate stream [-]

$J_i$ : Local flux of component "i" to the permeate stream [mol/s]

$F_i$ : Flowrate of component "i" in the feed stream [mol/s]

$L_i$ : Flowrate of component "i" in the retentate stream [mol/s]

$V_i$ : Flowrate of component "i" in the permeate stream [mol/s]

Equations:

$$J_i = 3.35 \times 10^{-9} \cdot q_i \cdot \delta \cdot (P_1 \cdot x_i - P_2 \cdot y_i)$$

$$y_i = \frac{J_i}{\sum_1^{\#_{comp}} J_i}$$

$$F = L + V$$

$$F \cdot x_i^{feed} = L \cdot \bar{x}_i + V \cdot \bar{y}_i$$

10. Amine absorption is used to remove residual CO<sub>2</sub> from the light olefins (C<sub>2,3</sub>=) stream. A separate Aspen Plus® model for CO<sub>2</sub> capture from a natural gas power plant using 30 wt% monoethanolamine (MEA) developed by Aspentech was used as a base case<sup>3</sup>. The process parameters were adjusted to limit the CO<sub>2</sub> concentration below 0.5 wt% in the C<sub>2,3</sub>=-rich stream and to avoid flooding or drying within the stages of the columns. A gas-liquid separation unit was included before the scrubber to separate part of the captured CO<sub>2</sub> by the pressure difference, this reduces the scrubber loading. The resulting energy requirements for this process model are within the boundaries of operation.<sup>4</sup>
11. A polymer-grade ethylene/propylene mixture (> 99.5 wt%)<sup>5</sup> is produced in each scenario.
12. The minimum energy requirements for each process were evaluated using Aspen Energy Analyzer. Figure S7 shows the Composite curves for the C<sup>2</sup>O-SOE scenario.

**Table S1.** Naphtha composition.<sup>6</sup>

| Component       | Mass fraction |
|-----------------|---------------|
| n-butane        | 0.0216        |
| isobutane       | 0.0012        |
| n-pentane       | 0.2734        |
| 2-methyl-butane | 0.2138        |
| Cyclopentane    | 0.0358        |
| n-hexane        | 0.2248        |
| cyclohexane     | 0.0384        |
| Benzene         | 0.0158        |
| n-heptane       | 0.0711        |
| Cycloheptane    | 0.0434        |
| Cycloheptene    | 0.0157        |
| n-octane        | 0.0224        |
| Cyclooctane     | 0.0092        |
| Cyclooctene     | 0.0055        |
| n-nonane        | 0.0079        |

**Table S2.** Permeability of gas components for the modeled cellulose acetate membrane.<sup>7</sup>

| Component                      | Permeability (Barrer) |
|--------------------------------|-----------------------|
| CO <sub>2</sub>                | 6.3                   |
| H <sub>2</sub>                 | 5.46                  |
| CO                             | 0.26                  |
| CH <sub>4</sub>                | 0.21                  |
| C <sub>2</sub> H <sub>4</sub>  | 0.45                  |
| C <sub>3</sub> H <sub>6</sub>  | 0.46                  |
| C <sub>4</sub> H <sub>10</sub> | 0.18                  |

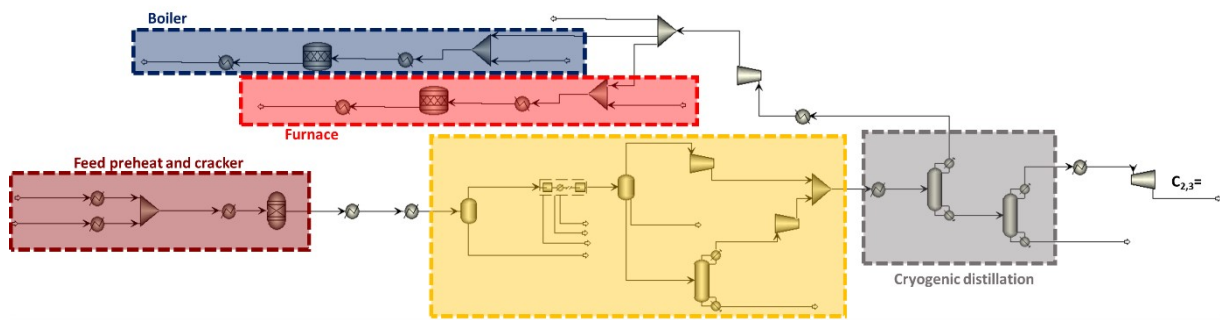

**Figure S1.** Process model for NSC and RDR

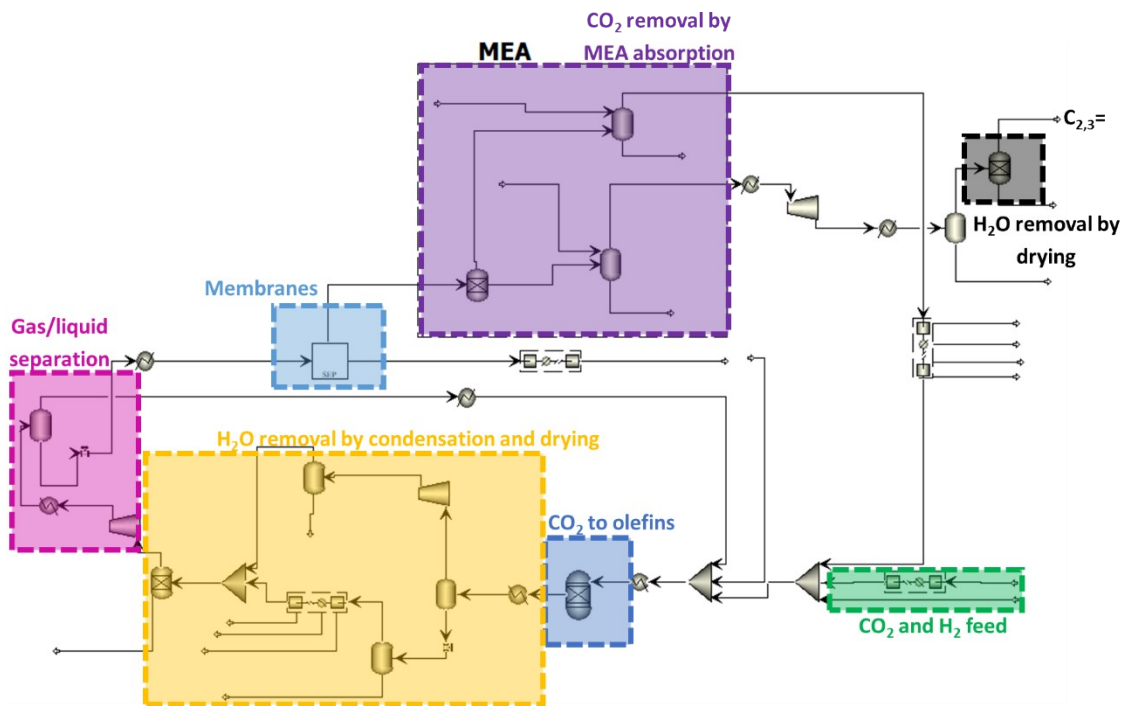

**Figure S2.** Process model for  $C^2O$

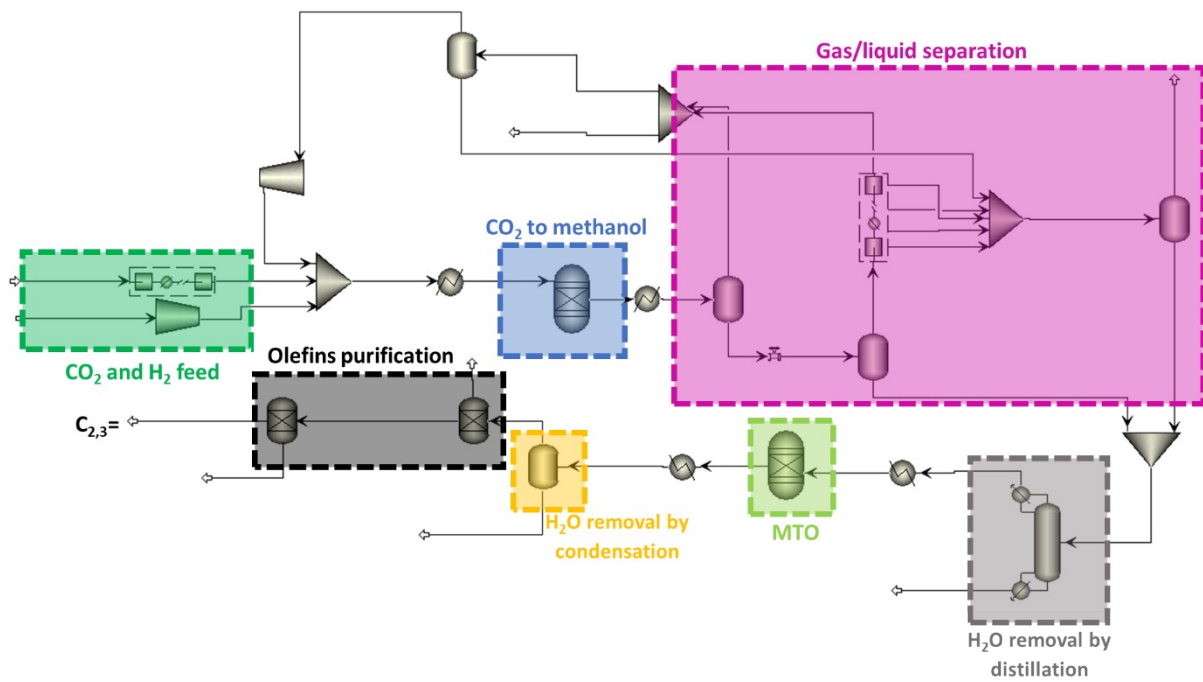

Figure S3. Process model for C<sup>2</sup>M+MTO

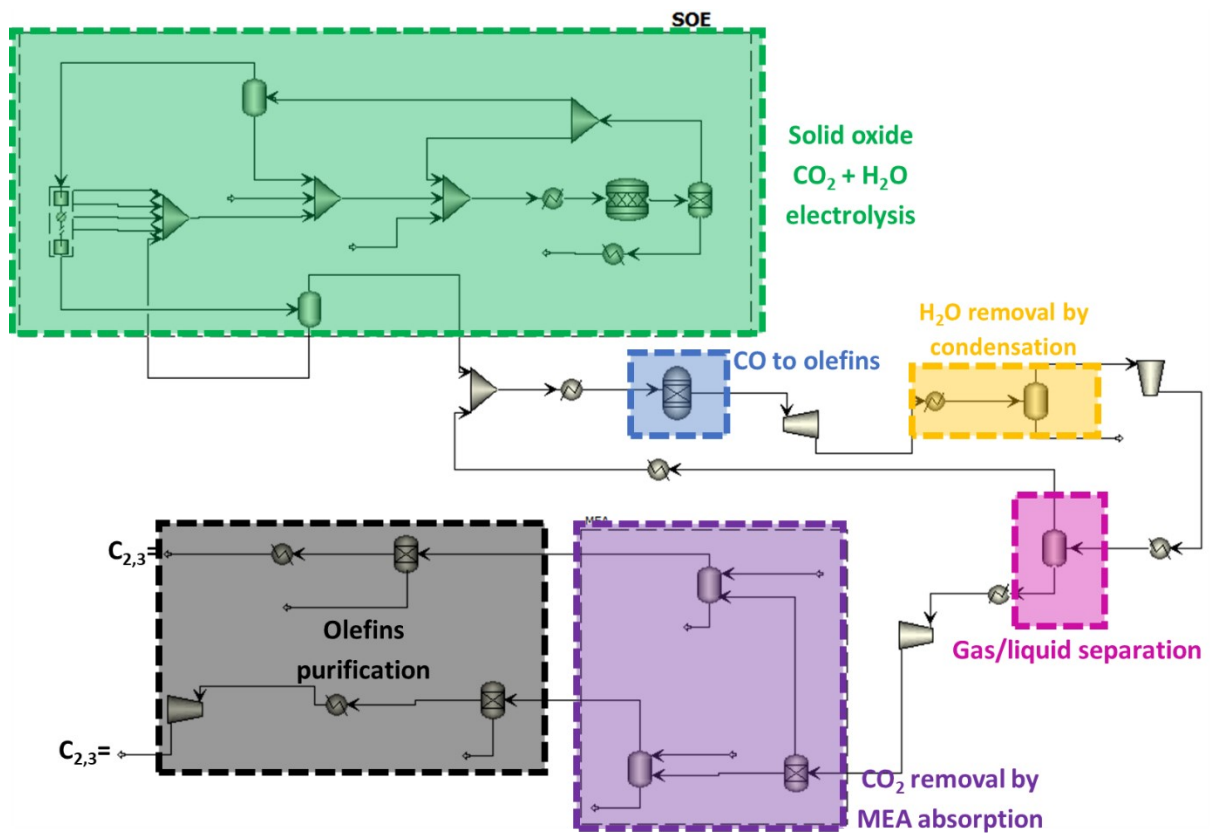

Figure S4. Process model for CO<sub>2</sub>red+COhyd

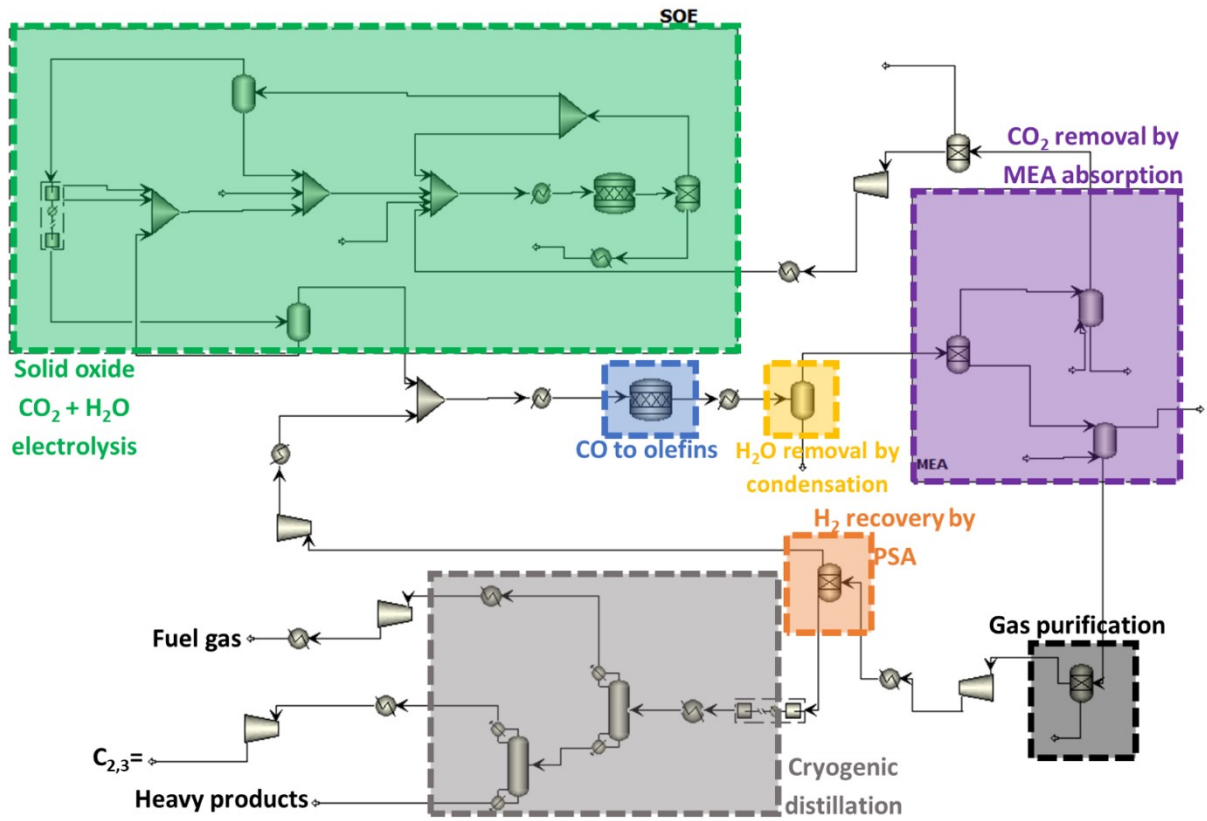

Figure S5. Process model for CO<sub>2</sub>red+FTO

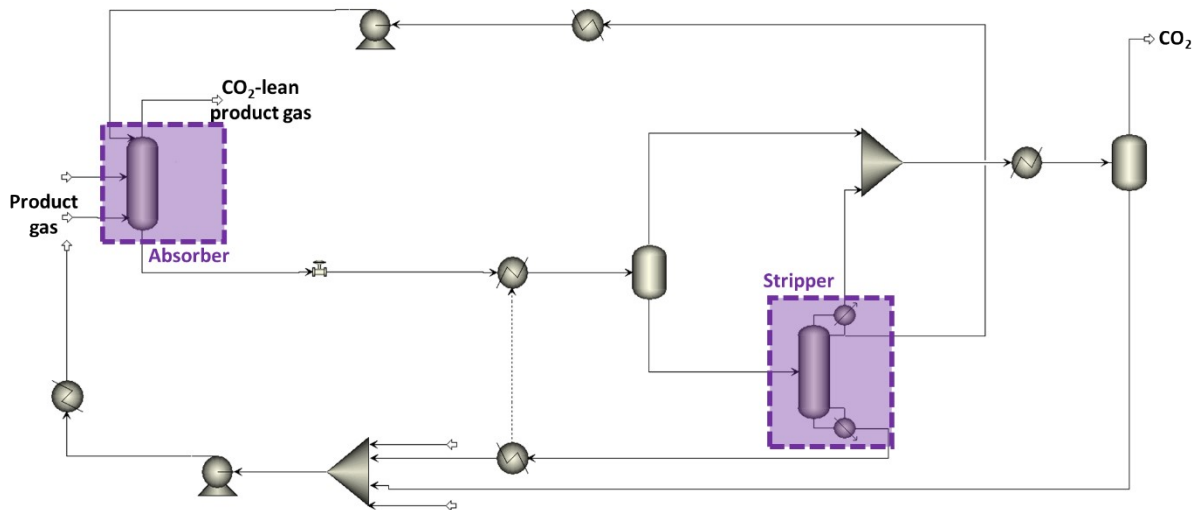

Figure S6. Process model for CO<sub>2</sub> removal using MEA absorption

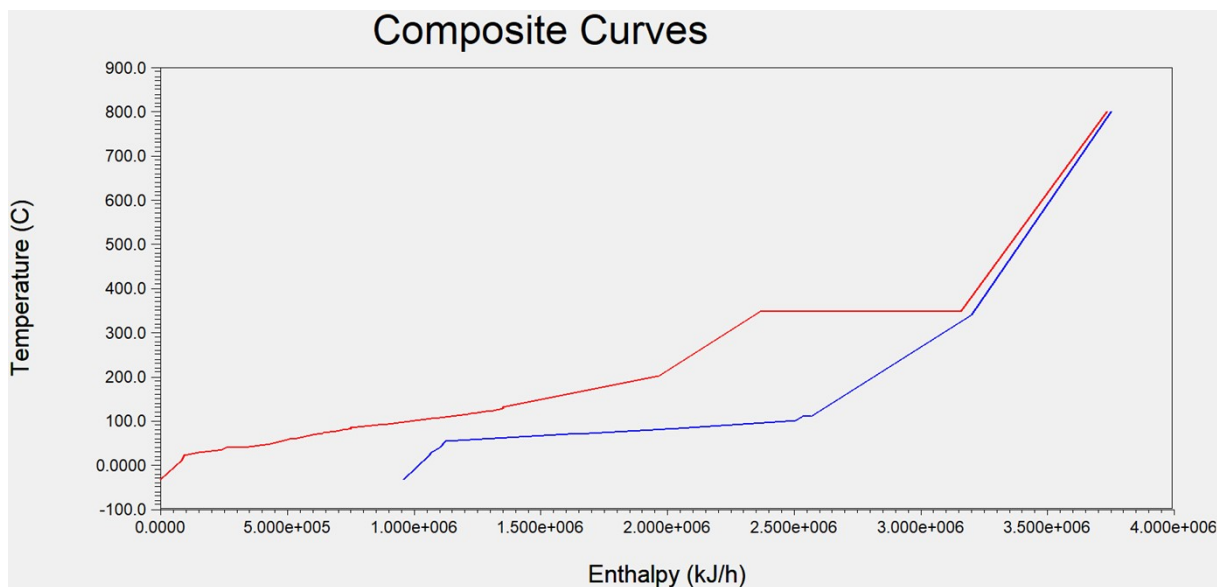

**Figure S7.** Composite curves from the Pinch analysis for the C<sup>2</sup>O-SOE scenario

## S2 C<sup>2</sup>O Scenario: separation section evaluation

In the C<sup>2</sup>O scenario, CO<sub>2</sub>, H<sub>2</sub> and the recycled gases are fed to the reactor where CO<sub>2</sub> and H<sub>2</sub> are converted to light olefins. Due to the complex product mixture, the separation section is key in determining the performance of the process. The possible separation section configuration includes a combination of the following units:

- i. **Gas-liquid separation units:** the boiling points of H<sub>2</sub>, CO, C<sub>2</sub>H<sub>4</sub>, CO<sub>2</sub> and C<sub>3</sub>H<sub>6</sub> at atmospheric pressure are -252.8 °C, -191.5 °C, -103.7 °C, -78.5 °C and -47.7 °C, respectively. The product mixture is separated in a gas-liquid separation unit (flash) operating at -14 °C or -30 °C and 1.8 MPa or 3.5 MPa. Most of the H<sub>2</sub> and CO remains in the gaseous stream while most of the CO<sub>2</sub> and C<sub>2,3</sub>= remains in the liquid stream. The gaseous stream is recycled to the C<sup>2</sup>O reactor, and the liquid stream continues to the next unit of the separation section.
- ii. **H<sub>2</sub> removal by Pressure Swing Adsorption (PSA):** PSA is a popular method to produce high purity H<sub>2</sub>. High H<sub>2</sub> recoveries are possible for gases with a H<sub>2</sub> content higher than 50%.<sup>8</sup> A PSA unit was modelled using dry product gas at 2.06 MPa and with a H<sub>2</sub> recovery of 92%.
- iii. **H<sub>2</sub> and CO<sub>2</sub> removal by cellulose acetate (CA) membranes:** After gas-liquid separation, the CO<sub>2</sub> and H<sub>2</sub> molar fractions in the liquid stream are below 15% and 1%, respectively. CA membranes have shown high permeabilities for CO<sub>2</sub> and H<sub>2</sub>, thus additional CO<sub>2</sub> and H<sub>2</sub> removal can be achieved using such a unit.
- iv. **CO<sub>2</sub> removal by absorption using a monoethanolamine (MEA) solution:** Amine scrubbing is a mature technology for CO<sub>2</sub> removal.<sup>9</sup> In this process, CO<sub>2</sub> is captured from the product gas at 40 °C by absorption using a 30 wt% MEA solution. Regeneration of the CO<sub>2</sub>-rich amine requires a high heating input, i.e., between 3.3 and 6.4 GJ per t CO<sub>2</sub> removed.<sup>2</sup> The required heat is provided by the exothermic C<sup>2</sup>O reactor.

Eight C<sup>2</sup>O separation scenarios are evaluated considering 4 different combinations of the separation units (Table S3). Water is removed by condensation and drying before entering the separation section in all scenarios.

**Table S3.** Separation section configuration evaluated for the C<sup>2</sup>O scenarios

| Scenario                   | Separation section configuration                                              |
|----------------------------|-------------------------------------------------------------------------------|
| <b>C<sup>2</sup>O-HP</b>   | H <sub>2</sub> -PSA → Flash (10 °C and 3.54 MPa) → Membrane → MEA absorption  |
| <b>C<sup>2</sup>O-NP</b>   | H <sub>2</sub> -PSA → Flash (-14 °C and 1.76 MPa) → Membrane → MEA absorption |
| <b>C<sup>2</sup>O-2MEM</b> | Membrane → Flash (25 °C and 3.54 MPa) → Membrane                              |
| <b>C<sup>2</sup>O-SMA</b>  | Flash (-29.7 °C and 1.795 MPa) → Membrane → MEA absorption                    |
| <b>C<sup>2</sup>O-SMT</b>  | Flash (-14 °C and 1.795 MPa) → Membrane → MEA absorption                      |
| <b>C<sup>2</sup>O-SHP</b>  | Flash (-29.7 °C and 3.55 MPa) → Membrane → MEA absorption                     |
| <b>C<sup>2</sup>O-STP</b>  | Flash (-14 °C and 3.55 MPa) → Membrane → MEA absorption                       |
| <b>C<sup>2</sup>O-NM</b>   | Flash (-29.7 °C and 1.795 MPa) → MEA absorption                               |

Key Performance Indicators (KPI) are defined to evaluate the performance of the C<sup>2</sup>O scenarios: Membrane load (Nm<sup>3</sup> gas treated/t C<sub>2,3</sub>=), CO<sub>2</sub> removed by MEA absorption (t CO<sub>2</sub> removed/t C<sub>2,3</sub>=), Electricity required (MWh/t C<sub>2,3</sub>=), Minimum cooling required (GJ/t C<sub>2,3</sub>=), C<sub>2,3</sub>= recovery in the separation section (%), C<sub>2,3</sub>= molar fraction at the inlet of the C<sup>2</sup>O reactor (%) and CO<sub>2</sub> and H<sub>2</sub> conversions in the C<sup>2</sup>O reactor (%). An overview of the KPI for the 8 C<sup>2</sup>O scenarios is shown in Table S4.

**Table S4.** Key performance indicators for the 8 evaluated C<sup>2</sup>O scenarios

| Case                                                                                | C <sup>2</sup> O-HP | C <sup>2</sup> O-NP | C <sup>2</sup> O-2MEM | C <sup>2</sup> O-SMA | C <sup>2</sup> O-SMT | C <sup>2</sup> O-SHP | C <sup>2</sup> O-STP | C <sup>2</sup> O-NM |
|-------------------------------------------------------------------------------------|---------------------|---------------------|-----------------------|----------------------|----------------------|----------------------|----------------------|---------------------|
| Electrolyzer type                                                                   | PEM                 | PEM                 | PEM                   | PEM                  | PEM                  | PEM                  | PEM                  | PEM                 |
| Membrane load (Nm <sup>3</sup> gas/t C <sub>2,3</sub> =)                            | 1005                | 948                 | 3787                  | <b>765</b>           | <b>717</b>           | <b>879</b>           | <b>811</b>           | -                   |
| CO <sub>2</sub> removed by MEA absorption (t CO <sub>2</sub> /t C <sub>2,3</sub> =) | 0.061               | 0.058               | -                     | <b>0.028</b>         | <b>0.019</b>         | <b>0.046</b>         | <b>0.034</b>         | <b>0.17</b>         |
| Electricity (MWh/t C <sub>2,3</sub> =)                                              | 20.0                | 20.0                | 20.2                  | <b>19.8</b>          | <b>19.8</b>          | <b>19.8</b>          | <b>19.8</b>          | <b>19.8</b>         |
| Cooling (GJ/t C <sub>2,3</sub> =)                                                   | 22.1                | 22.5                | 22.6                  | <b>22.0</b>          | <b>22.1</b>          | <b>22.1</b>          | <b>21.9</b>          | <b>21.9</b>         |
| C <sub>2,3</sub> = recovery in separation section (%)                               | 68.5                | 68.9                | 54.3                  | <b>55.5</b>          | <b>40.7</b>          | <b>66.2</b>          | <b>56.4</b>          | <b>63.6</b>         |
| C <sub>2,3</sub> = molar feed to reactor (%)                                        | 2.89                | 2.84                | 5.09                  | <b>4.91</b>          | <b>8.43</b>          | <b>3.21</b>          | <b>4.74</b>          | <b>3.60</b>         |
| CO <sub>2</sub> conversion (%)                                                      | 76.2                | 76.1                | 75.4                  | <b>75.5</b>          | <b>74.4</b>          | <b>76.1</b>          | <b>75.5</b>          | <b>75.8</b>         |
| H <sub>2</sub> conversion (%)                                                       | 76.1                | 76.1                | 75.4                  | <b>75.5</b>          | <b>74.4</b>          | <b>76.0</b>          | <b>75.5</b>          | <b>75.9</b>         |

C<sup>2</sup>O-2MEM removes H<sub>2</sub> and CO<sub>2</sub> from the dry product stream using a highly selective membrane. The production of polymer-grade C<sub>2,3</sub>= without MEA adsorption was possible using a 2-stage membrane separation (Figure 8). However, this scenario requires the most electricity per t C<sub>2,3</sub>= due to the additional electricity for recompression of the recycle gas. This scenario requires a 5 times larger membrane load with respect to other C<sup>2</sup>O cases. The removal of the residual CO<sub>2</sub> and H<sub>2</sub>O using adsorption beds is required in this case. This configuration is sensitive to the performance of the C<sup>2</sup>O reactor and membranes.

H<sub>2</sub> can be recovered using a H<sub>2</sub>-PSA unit because of the high H<sub>2</sub> content in the dry product gas. Scenarios C<sup>2</sup>O-HP and C<sup>2</sup>O-NP include a H<sub>2</sub>-PSA in the separation section (Figure S9). After H<sub>2</sub> recovery, CO and additional H<sub>2</sub> are separated in a gas-liquid separation unit. The liquid stream is vaporized and

the  $C_{2,3}$  are recovered using membrane separation. To produce polymer-grade  $C_{2,3}$ , additional  $CO_2$  is removed using MEA absorption and residual  $CO_2$  and  $H_2O$  are removed using adsorption beds. When using the  $H_2$ -PSA unit, the  $C^2O$  process achieves higher  $C_{2,3}$  recoveries, lower  $C_{2,3}$  molar fractions at the inlet of the  $C^2O$  reactor and slightly higher  $CO_2$  conversions. Yet, these scenarios require the most electricity per t  $C_{2,3}$  and the largest  $CO_2$  absorption removal, after  $C^2O$ -2MEM.

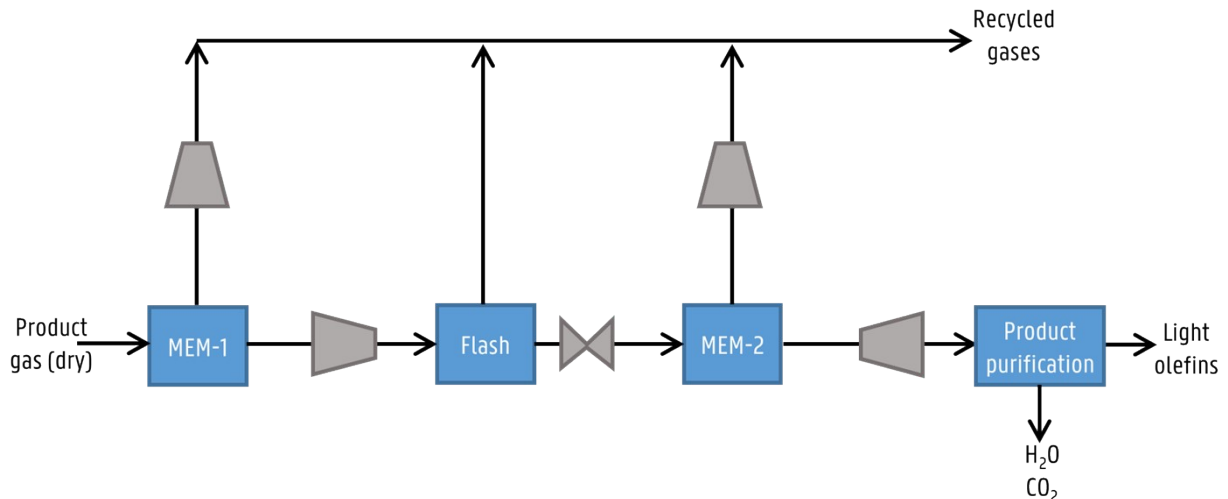

**Figure S8.** Separation section for  $C^2O$ -2MEM.

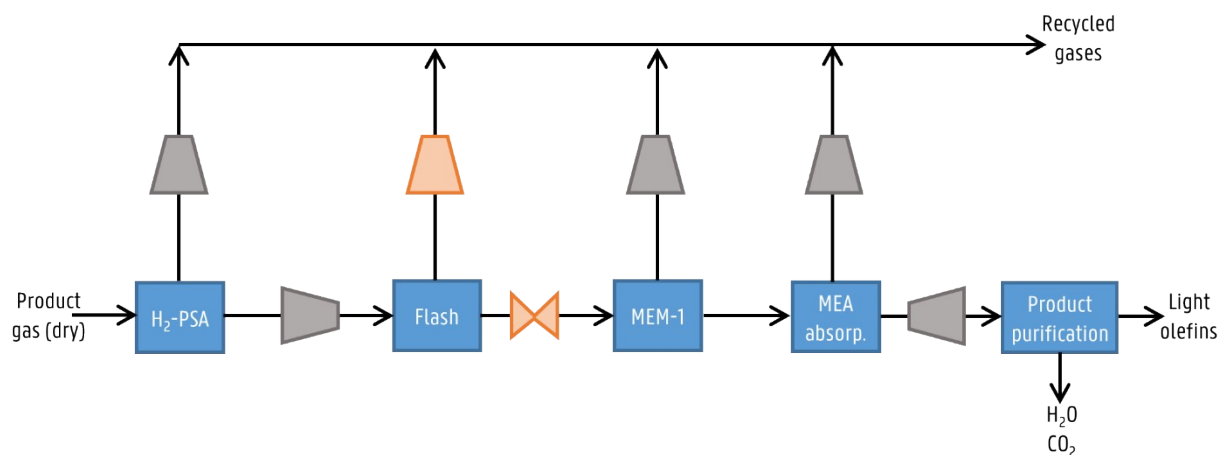

**Figure S9.** Separation section for  $C^2O$ -HP and  $C^2O$ -NP.  $C^2O$ -HP does not require the orange compressor and  $C^2O$ -NP does not require the orange valve.

The simplest separation is applied in  $C^2O$ -NM, this scenario does not use membranes (Figure S10).  $H_2$  and  $CO$  are removed by a gas-liquid separation unit and the  $CO_2$  is removed by MEA absorption. The  $H_2O$  from MEA absorption is removed by drying to achieve a polymer-grade product. The  $C^2O$  reactor provides enough heat for the regeneration of the amines, thus no external heat is required.

$C^2O$ -SMA,  $C^2O$ -SMT,  $C^2O$ -SHP and  $C^2O$ -STP use the separation configuration of  $C^2O$ -HP and  $C^2O$ -NP but without the  $H_2$ -PSA unit (Figure 11). The combination of 2 pressures (1.795 MPa and 3.55 MPa) and 2 temperatures ( $-29.7\text{ }^\circ\text{C}$  and  $-14\text{ }^\circ\text{C}$ ) is evaluated in the gas-liquid separators. Most of the  $H_2$  and  $CO$  are removed in the flash, thus the membrane loads are the lowest. Polymer-grade  $C_{2,3}$  is produced by removing  $CO_2$  using MEA absorption and  $H_2O$  using a drying bed.

$C^2O$ -SHP,  $C^2O$ -SMA,  $C^2O$ -STP,  $C^2O$ -SMT and  $C^2O$ -NM require the least electricity among the 8 evaluated scenarios (in bold in Table S4).  $C^2O$ -SHP is selected as the optimal  $C^2O$  scenario because it has the



highest  $C_{2,3=}$  recovery in the product, the lowest  $C_{2,3=}$  molar feed to the reactor and the highest  $CO_2$  and  $H_2$  conversions.

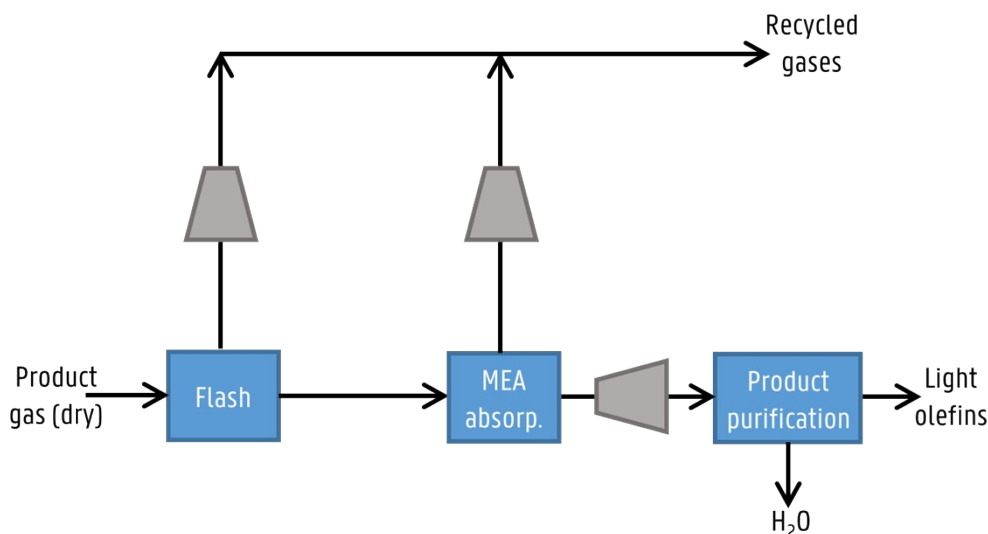

**Figure S10.** Separation section for  $C^2O$ -NM.

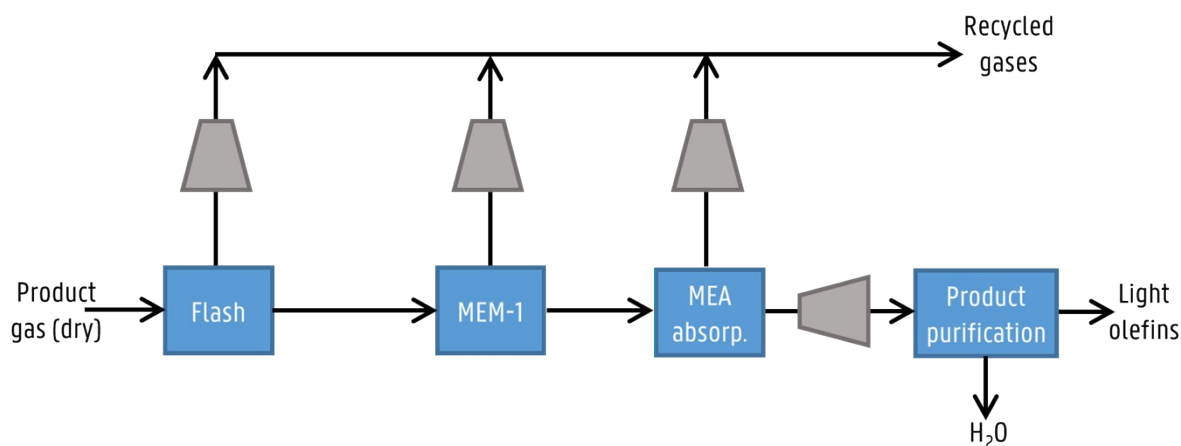

**Figure S11.** Separation section for  $C^2O$ -SMA,  $C^2O$ -SMT,  $C^2O$ -SHP and  $C^2O$ -STP.

### S3 $C^2O$ -SOE Scenario: sensitivity analyses

Five additional simulations evaluate the sensitivity of the  $C^2O$ -SOE scenario to the following parameters: (i) lower  $CO_2$  conversion ( $C^2O$ -LC), (ii) lower  $C_{2,3=}$  selectivity ( $C^2O$ -LS), (iii) lower propylene/ethylene ( $C_3=/C_2=$ ) ratio ( $C^2O$ - $C_3C_2R$ ), (iv) lower  $CO_2$  permeability for the membrane ( $C^2O$ -LPM) and (v) including paraffins as possible products in the  $C^2O$  reactor ( $C^2O$ -paraffins). An overview of the KPIs is shown in Table S5.

#### (i) $C^2O$ -LC: lower $CO_2$ conversion in the $C^2O$ reactor

The  $CO_2$  conversion is reduced from 75.5% to 30.0%, the product distribution was defined by the RGIBBS reactor. The selectivity to  $C_{2,3=}$  is 100% and, due to the stoichiometric  $H_2:CO_2$  molar feed, the  $H_2$  conversion equals the  $CO_2$  conversion. The lower conversions cause a larger gas recycle, thus the membrane size and the  $CO_2$  removed by MEA absorption are 4 and 7 times larger, respectively. Around 6% more electricity and 70% more cooling are required, due to: (i) the compression of a larger gas recycle and (ii) lower temperature required by cryogenic refrigeration to reach a similar  $C_{2,3=}$  recovery in the flash. It is

challenging to recover  $C_{2,3=}$ , yet the  $C_{2,3=}$  molar fraction at the inlet of the  $C^2O$  reactor is halved.

(ii)  $C^2O$ -LS: lower  $C_{2,3=}$  selectivity in the  $C^2O$  reactor

The  $CO_2$  conversion is fixed to 75.5% and the CO selectivity is increased from 0.01% to 80%. The  $H_2$  conversion is lower than the  $CO_2$  conversion due to the lower  $H_2$  consumption for CO production (1:1  $H_2:CO_2$ ). The gaseous stream from the gas-liquid separation is rich in CO, thus a CO hydrogenation (RGIBBS) reactor is implemented to produce additional  $C_{2,3=}$ . This reactor operates at 420 °C and 4 MPa. This new section required an additional  $H_2O$  removal step and gas-liquid separation unit. The liquid streams from the flashes are mixed and vaporized for membrane separation. The  $CO_2$  concentration is larger due to the lower yield to  $C_{2,3=}$ , thus the membrane size increases by 20% and 50% more  $CO_2$  is removed by MEA absorption. The total electricity requirements increase by 0.4 MWh/t  $C_{2,3=}$  due to additional cryogenic cooling and compression. Around 60% additional cooling are required per t  $C_{2,3=}$ . This case achieves a lower  $C_{2,3=}$  recovery and a lower  $C_{2,3=}$  molar fraction at the inlet of the  $C^2O$  reactor.

(iii)  $C^2O$ - $C_3C_2R$ : lower  $C_3=/C_2=$  ratio in the  $C^2O$  reactor

The  $CO_2$  conversion and CO selectivity are fixed to 75.5% and 0.01% and the  $C_3=/C_2=$  ratio is reduced from 95 to 3. The  $C_{2,3=}$  recovery decreases from 56% to 52% in the gas-liquid separation unit due to the slightly larger  $C_2=$  losses to the gaseous stream. More  $C_{2,3=}$  are recycled to the  $C^2O$  reactor and the  $C_{2,3=}$  molar feed composition increases to 6.9%. The membrane size and  $CO_2$  removed by MEA absorption increase by around 10% and the electricity requirements increase by around 1%, due to additional cryogenic cooling.

(iv)  $C^2O$ -LPM: lower  $CO_2$  permeability for the membrane

The  $CO_2$  permeability of the membrane was halved and the performance of the  $C^2O$  reactor is defined by the RGIBBS block. The membrane size slightly increases by around 2% but less  $CO_2$  is separated in the unit, thus the  $CO_2$  removed by MEA absorption doubles. Yet, the electricity and cooling requirements did not increase significantly. In this scenario, the  $C_{2,3=}$  losses in the permeate slightly increase and the  $C_{2,3=}$  recovery,  $C_{2,3=}$  feed molar ratio and the  $CO_2$  conversion slightly decrease.

(v)  $C^2O$ -paraffins: paraffins are possible products in the  $C^2O$  reactor

The  $CO_2$  conversion and CO selectivity are fixed to 75.5% and 0.01% and the  $C_{2,3=}$  selectivities are adapted to produce a paraffins/olefins ratio of 5. Cryogenic distillation is required to remove the paraffins from the  $C_{2,3=}$ , this increases the  $C_{2,3=}$  recovery and decreases the recycle of  $C_{2,3=}$  to the  $C^2O$  reactor. The  $H_2$  conversion is slightly higher than the  $CO_2$  conversion due to the stoichiometry of the  $CO_2$  to paraffins reactions. The electricity required increases by 3% because more  $H_2$  is required per t  $C_{2,3}$  but also because the process requires 1% more electricity and cryogenic refrigeration 54% more. This case does not produce enough excess steam for the SOE, thus electric boilers use additional 0.28 MWh/t  $C_{2,3}$  electricity. Around 20% additional cooling is required and the cooling water volume triplicates. The membrane separation and  $CO_2$  removal by MEA absorption increase by 3% and 4%, respectively.

**Table S5.** Key performance indicators for the C<sup>2</sup>O sensitivity analyses

| Case                                                                                      | C <sup>2</sup> O | C <sup>2</sup> O-LC | C <sup>2</sup> O-LS | C <sup>2</sup> O-C <sub>3</sub> C <sub>2</sub> R | C <sup>2</sup> O-LPM | C <sup>2</sup> O-paraffins                 |
|-------------------------------------------------------------------------------------------|------------------|---------------------|---------------------|--------------------------------------------------|----------------------|--------------------------------------------|
| Electrolyzer type                                                                         | SOE              | SOE                 | SOE                 | SOE                                              | SOE                  | SOE                                        |
| Membrane load<br>(Nm <sup>3</sup> gas/t C <sub>2,3</sub> =)                               | 879              | 2799                | 1048                | 947                                              | 905                  | 851 Nm <sup>3</sup> gas/t C <sub>2,3</sub> |
| CO <sub>2</sub> removed by MEA<br>absorption<br>(t CO <sub>2</sub> /t C <sub>2,3</sub> =) | 0.046            | 0.31                | 0.070               | 0.046                                            | 0.096                | 0.048                                      |
| Electricity<br>(MWh/t C <sub>2,3</sub> =)                                                 | 16.0             | 17.0                | 16.4                | 16.2                                             | 16.0                 | 16.5                                       |
| Cooling<br>(GJ/t C <sub>2,3</sub> =)                                                      | 8.1              | 14.1                | 12.7                | 8.75                                             | 8.1                  | 9.9                                        |
| C <sub>2,3</sub> = recovery in<br>separation section<br>(%)                               | 66.2             | 62.4                | 63.8                | 51.9                                             | 64.4                 | 65.6                                       |
| C <sub>2,3</sub> = molar feed to<br>reactor (%)                                           | 3.21             | 1.54                | 1.91                | 6.92                                             | 3.46                 | 2.99                                       |
| CO <sub>2</sub> conversion (%)                                                            | 76.1             | 30.0                | 75.5                | 75.5                                             | 75.9                 | 75.5                                       |
| H <sub>2</sub> conversion (%)                                                             | 76.0             | 30.0                | 35.1                | 75.5                                             | 75.9                 | 76.9                                       |

#### S4 Economic feasibility of the scenarios

The break-even electricity prices were estimated to evaluate the economic feasibility of the different scenarios. The Break-Even Electricity price (BEE) was calculated using the equation below and the assumed utilities and material costs in Table S6. Light olefins, fuel gas, by-products and excess steam produce a profit, while the operational costs included water for electrolysis, water for cooling and naphtha. The cost of CO<sub>2</sub> as feedstock was not considered.

$$BEE \left( \frac{EUR}{MWh} \right) = \frac{\sum profit \left( \frac{EUR}{ton C_{2,3}=} \right) - \sum costs \left( \frac{EUR}{ton C_{2,3}=} \right)}{Electricity\ required \left( \frac{MWh}{ton C_{2,3}=} \right)}$$

**Table S6.** Assumed utilities and material costs for the processes

| Materials and Utilities | Value                         | Reference                                                               |
|-------------------------|-------------------------------|-------------------------------------------------------------------------|
| <b>Utilities:</b>       |                               |                                                                         |
| Water for cooling       | 0.35 EUR/GJ                   | Based on <sup>10</sup> .                                                |
| Water for electrolysis  | 0.07 EUR/kg H <sub>2</sub>    | Based on <sup>11</sup> .                                                |
| High pressure steam     | 17.7 EUR/GJ                   | Based on <sup>10</sup> .                                                |
| Medium pressure steam   | 13.7 EUR/GJ                   | Average value between <sup>10</sup> and <sup>11</sup> .                 |
| Low pressure steam      | 9.6 EUR/GJ                    | Based on <sup>12</sup> .                                                |
| <b>Materials:</b>       |                               |                                                                         |
| Naphtha                 | 640 EUR/t naphtha             | Based on <sup>13</sup> .                                                |
| Light olefins           | 1000 EUR/t C <sub>2,3</sub> = | Average in the range given by <sup>14</sup> .                           |
| Fuel gas                | 11.4 EUR/GJ                   | Based on <sup>15</sup> .                                                |
| By-products             | 854 EUR/t by-products         | Selected to obtain a break-even electricity price of 50 EUR/MWh for NSC |

The price of by-products was adjusted so the NSC case would break-even at an electricity price of 50 EUR/MWh, this would allow for a comparative analysis between scenarios. The break-even electricity prices are summarized in Table S7 considering: (a) profit from steam as by-product and no CO<sub>2</sub> tax, (b) profit from steam as by-product and including CO<sub>2</sub> tax (100 EUR/t CO<sub>2</sub>), and (c) no profit from steam as by-product and including CO<sub>2</sub> tax (100 EUR/t CO<sub>2</sub>).

The RDR scenarios are the most feasible due to the lower naphtha input per ton C<sub>2,3=</sub> than NSC and the lower electricity consumption than the CO<sub>2</sub>-based routes. The e-NSC scenario requires a slightly more economic electricity than NSC (below 43 EUR/MWh) to be profitable. The C<sup>2</sup>O-SOE and CO<sub>2</sub>red+COhyd cases are the next most feasible cases, mainly due to the lower electricity required per ton C<sub>2,3=</sub> among the other CO<sub>2</sub>-based scenarios, they are break-even for an electricity price of 61-86 EUR/MWh, depending on the additional income from steam export and the CO<sub>2</sub> tax price. C<sup>2</sup>M+MTO-SOE is slightly less feasible due to the lower excess steam available for export. CO<sub>2</sub>red+FTO is the least feasible among the CO<sub>2</sub>-based routes due to the high electricity required per ton C<sub>2,3=</sub> and lack of steam available for export.

**Table S7.** Break-even electricity price

| Scenario                  | Break-even electricity price                                  | Break-even electricity price                                    | Break-even electricity price            |
|---------------------------|---------------------------------------------------------------|-----------------------------------------------------------------|-----------------------------------------|
|                           | steam as by-product and without CO <sub>2</sub> tax [EUR/MWh] | steam as by-product and including CO <sub>2</sub> tax [EUR/MWh] | including CO <sub>2</sub> tax [EUR/MWh] |
| NSC                       | 50                                                            | 4                                                               | 50                                      |
| e-NSC                     | 44                                                            | 43                                                              | 44                                      |
| RDR                       | 93                                                            | 90                                                              | 93                                      |
| e-RDR                     | 114                                                           | 113                                                             | 114                                     |
| C <sup>2</sup> O-PEME     | 58                                                            | 73                                                              | 50                                      |
| C <sup>2</sup> O-SOE      | 67                                                            | 86                                                              | 62                                      |
| C <sup>2</sup> M+MTO-PEME | 53                                                            | 68                                                              | 50                                      |
| C <sup>2</sup> M+MTO-SOE  | 63                                                            | 82                                                              | 61                                      |
| CO <sub>2</sub> red+COhyd | 67                                                            | 85                                                              | 61                                      |
| CO <sub>2</sub> red+FTO   | 41                                                            | 46                                                              | 41                                      |

## References

1. C. Lee and Y. Chang, *IOP Conference Series: Earth and Environmental Science*, 2019, **252**, 032112.
2. W. L. McCabe and J. C. Harriot, *Unit Operations in Chemical Engineering*, McGraw-Hill, New York, 5th edition edn., 1993.
3. AspenTech, "CO<sub>2</sub> Capture from Natural Gas Power Plant using MEA", 2021.
4. P. C. Chen and Y.-L. Lai, *Energies*, 2019, **12**, 2202.
5. A. Boulamanti and J. Moya Rivera, *Energy efficiency and GHG emissions: prospective scenarios for the chemical and petrochemical industry*, European Commission, Luxembourg, 2017.
6. M. Alyani, J. Towfighi and S. M. Sadrameli, *Korean Journal of Chemical Engineering*, 2011, **28**, 1351-1358.
7. T. N. Do and J. Kim, *Energy Conversion and Management*, 2020, **214**, 112866.
8. UOP LLC, *US Pat.*, 0036671, 2018.

9. H. Mikulčić, I. Ridjan Skov, D. F. Dominković, S. R. Wan Alwi, Z. A. Manan, R. Tan, N. Duić, S. N. Hidayah Mohamad and X. Wang, *Renewable and Sustainable Energy Reviews*, 2019, **114**, 109338.
10. J. Collis, K. Duch, and R. Schomäcker, "Techno-economic assessment of jet fuel production using the Fischer-Tropsch process from steel mill gas," *Frontiers in Energy Research*, Original Research vol. 10, 2022-December-07 2022.
11. J. Collis and R. Schomäcker, "Determining the Production and Transport Cost for H2 on a Global Scale," *Frontiers in Energy Research*, Original Research vol. 10, 2022-May-27 2022.
12. M. Dreillard, P. Broutin, P. Briot, T. Huard and A. Lettat, *Energy Procedia*, 2017, 114, 2573–2589.
13. Trading Economics, Naphtha. <https://tradingeconomics.com/commodity/naphtha> (accessed March 26<sup>th</sup>, 2023)
14. Van Dael, Belgium, Market study report CCU. 2018.
15. Trading Economics, Natural Gas EU Dutch TTF. <https://tradingeconomics.com/commodity/eu-natural-gas> (accessed March 26<sup>th</sup>, 2023)
